1 **2.8 Å resolution cryo-EM structure of human parechovirus 3 in**  
2 **complex with Fab from a neutralizing antibody**

3 Aušra Domanska<sup>a,b#</sup>, Justin W. Flatt<sup>a,b</sup>, Joonas J.J. Jukonen<sup>a,b</sup>, James A. Geraets<sup>a,b</sup>, Sarah J.  
4 Butcher<sup>a,b#</sup>

5

6 <sup>a</sup> Faculty of Biological and Environmental Sciences, Molecular and Integrative Bioscience Research  
7 Programme, University of Helsinki, Helsinki, Finland

8 <sup>b</sup> Helsinki Institute of Life Sciences, Institute of Biotechnology, University of Helsinki, Helsinki,  
9 Finland

10

11 Running title: Human parechovirus 3 in complex with Fabs

12

13 # Correspondence to Aušra Domanska [ausra.domanska@helsinki.fi](mailto:ausra.domanska@helsinki.fi), and Sarah J. Butcher  
14 [sarah.butcher@helsinki.fi](mailto:sarah.butcher@helsinki.fi)

15

16 Abstract includes 133 words

17 Importance includes 104 words

18 Text (without title page, abstract, importance, references, table, and figure legends) includes 4179  
19 words

## 20 **Abstract**

21 Human parechovirus 3 (HPeV3) infection is associated with sepsis in neonates characterized by  
22 significant immune activation and subsequent tissue damage. Strategies to limit infection have been  
23 unsuccessful due to inadequate molecular diagnostic tools for early detection and lack of a vaccine  
24 or specific antiviral therapy. Towards the latter, we present a 2.8 Å-resolution structure of HPeV3 in  
25 complex with fragments from a neutralizing human monoclonal antibody AT12-015 using cryo-EM  
26 and image reconstruction. Modeling revealed that the epitope extends across neighboring  
27 asymmetric units with contributions from capsid proteins VP0, VP1, and VP3. Antibody decoration  
28 was found to block binding of HPeV3 to cultured cells. Additionally at high-resolution, it was  
29 possible to model a stretch of RNA inside the virion and from this identify the key features that  
30 drive and stabilize protein-RNA association during assembly.

## 31 **Importance**

32 HPeV3 is receiving increasing attention as a prevalent cause of sepsis-like symptoms in neonates,  
33 which despite the severity of disease, there are no effective treatments available. Structural and  
34 molecular insights into virus neutralization are urgently needed, especially as clinical cases are on  
35 the rise. Towards this goal, we present the first structure of HPeV3 in complex with fragments from  
36 a neutralizing monoclonal antibody. At high-resolution it was possible to precisely define the  
37 epitope that when targeted, prevents virions from binding to cells. Such an atomic-level description  
38 is useful for understanding host-pathogen interaction, viral pathogenesis mechanisms, and for  
39 finding potential cures for infection and disease.

## 40 **Keywords**

41 **human parechovirus 3, neutralizing antibody, genome packaging, cryo-EM**

## 42 **Introduction**

43 HPeV3 is a small, non-enveloped, single-stranded, positive-sense RNA virus, belonging to the  
44 *Parechovirus* genus of *Picornaviridae*, which currently includes 19 genotypes most commonly  
45 associated with mild gastrointestinal and respiratory illness (1, 2). Increased availability of sequence

46 data in clinical settings has clarified that HPeV3 causes the most virulent infections of the HPeVs,  
47 particularly in infants less than 3 months of age where sickness can trigger a sepsis-like  
48 dysregulated host response often involving the central nervous system (3-9). In cases of acute  
49 meningitis or encephalitis where patients may develop abnormal white matter lesions, neurological  
50 sequelae and even death may occur (10-15). To date, no effective treatments for HPeV3 infection  
51 are available, highlighting the urgent need for a greater understanding of the structural and  
52 molecular basis for HPeV3 neutralization, especially as epidemics are likely to continue (2, 16-18).  
53 The HPeV3 virion is composed of 60 copies of the three structural proteins (VP0, VP1, and VP3)  
54 that fit together to form a 28-nm-diameter icosahedral shell around the ~7.3 kb single-stranded  
55 RNA viral genome (19). The genome encodes a single polyprotein that during infection is  
56 subsequently cleaved into all the essential capsid components and replication proteins (2A, 2B, 2C,  
57 3A, 3B, 3C and 3D) (20). In HPeV1, recent work has shown that newly synthesized viral RNA  
58 contains ~60 spatially defined, conserved sequence/structure GXUXUXXU motifs that bind capsid  
59 proteins, driving genome encapsidation and efficient capsid self-assembly (21, 22). Assembled  
60 capsids lack cleavage of VP0 into VP2 and VP4 products, resulting in a shell made of three proteins  
61 rather than the four found in most other picornaviruses. Around the pentamers there is a depression  
62 referred to as the canyon. The tips of the three-fold symmetric propeller-like protrusions are  
63 adjacent to this canyon.

64 The VP1 C terminus of several human parechoviruses (e.g., HPeV -1, -2, -4, and -5) contains an  
65 arginine-glycine-aspartic acid (RGD) motif that can attach to  $\alpha V\beta 1$ ,  $\alpha V\beta 3$ , and  $\alpha V\beta 6$  integrin  
66 receptors (23, 24). HPeV3 lacks the RGD motif and thus likely uses a different, as yet unknown,  
67 receptor for cell entry (25). Reliance on a different receptor may alter tissue tropism and could  
68 explain why HPeV3 infections have different clinical and epidemiological features compared to  
69 other HPeV genotypes.

70 Human monoclonal antibodies (mAbs) can be exploited to gain valuable insights into the structural  
71 basis for neutralizing activity, which in turn can be used for developing effective treatments. High-

72 resolution mapping of mAb sites at the HPeV3 capsid surface allows for identification of epitopes  
73 recognized by the humoral immune system and may begin to provide mechanistic clues into  
74 immune surveillance, evasion, or escape. Here, using high-resolution cryo-EM we define such an  
75 epitope, that when targeted by a human monoclonal antibody, blocks attachment of virions to host  
76 cells; hence also describing a potential site for receptor binding.

## 77 **Results**

### 78 **Cryo-EM structure of the HPeV3-Fab AT12-015 complex**

79 Cryo-grids containing vitrified Fab-labeled virus were imaged and after data processing in  
80 RELION , a total of 74,927 particle projections were selected, which yielded a 3D reconstruction  
81 extending to 2.8 Å resolution according to the gold-standard Fourier shell correlation 0.143  
82 criterion (Table 1 and Figure 1A) (26). Fab decoration on the capsid surface helped to assign  
83 particle orientations during data processing. The capsid was resolved to 2.3 Å, whereas small  
84 stretches of capsid associated RNA and peripheral regions of Fab were defined at a resolution lower  
85 than 3.5 Å (Figure 1B). In the structure, Fab molecules bind to symmetry-related sites at the tips of  
86 the propellers on the surface of the virion (Figure 2A-C). For fitting, large regions of the map  
87 showed clear delineation of secondary structural elements, including amino acid and nucleic acid  
88 densities (Figure 2D-G). In this manner, we could accurately map the antibody footprint on the  
89 capsid surface, as well as visualize an RNA base-stacking motif that stably anchors the genome to  
90 the capsid via interaction with a tryptophan residue (Trp 24) in the HPeV3 VP3 coat protein (Figure  
91 2F and G).

### 92 **Characterization of the Fab AT12-015 Epitope**

93 In the reconstruction, the signal related to the Fab heavy and light chains is roughly as strong as that  
94 of the viral capsid, indicating 100% occupancy of the 60 available binding sites on the virion  
95 (Figure 1B). The quality of the map was such that we could fit atomic coordinates for the Fab, as  
96 well as for the three viral coat proteins, and this was followed by MDFF all-atom refinement.  
97 Results from flexible fitting revealed that the Fab targets an extended, solvent-accessible VP0-VP1-

98 VP1'-VP3' (' denotes a neighboring asymmetric unit) conformational epitope. There is no evidence  
99 of induced structural changes in any of the capsid proteins upon Fab binding. Using a 3.6 Å  
100 distance cutoff we identified 28 capsid residues forming the epitope and 29 Fab residues that form  
101 the paratope (Figure 3A). Residues from the capsid that are involved in forming the immune  
102 complex are conserved among HPeV3 strains, but not for HPeV1 or other parechovirus types. Six  
103 hydrogen bonds at the interface were identified, three from the heavy chain: Arg 58 to VP1 residue  
104 Asp 87, Tyr 59 to VP1 residue Asn 138, and Arg 99 to VP3 residue Leu 252, and three from the  
105 light chain: Ser 28 to VP0 residue Glu 285, Asn 93 to VP1 residue Asp 137, and Ser 30 to VP3  
106 residue Gly 207, that have angles in the range of 138-180° and are closely spaced to stably interact  
107 with exposed backbone nitrogen and oxygen atoms in the capsid proteins (Figure 3B). An  
108 additional hydrogen bond may form between the Fab light chain residue Ser 67 and VP3 residue  
109 Gln 209. However, the density in this area of the map was weak and because of this it was not  
110 possible to assess whether suitable geometric conditions were met for the interaction to occur other  
111 than the fact that the residue pair was in close proximity. One salt bridge between heavy chain  
112 amino acid Glu 105 and VP3 residue His 206 was inferred by the fact that centroids of the  
113 oppositely charged functional groups of the residues were within a 4 Å cutoff; and the Glu carbonyl  
114 oxygen atom was within 4 Å distance from the nitrogen atom of the His side chain (Figure 3B).  
115 This His 206 is centrally located in the footprint for the antibody and it was recently reported to be  
116 critical for binding and neutralization based on experimental selection of an antibody AT12-015  
117 resistant HPeV3 variant (VP3 His 206 to Tyr) (27).

118

### 119 **Human monoclonal antibody AT12-015 prevents HPeV3 entry into cells**

120 To probe HPeV3 A308/99-specific neutralization, we assayed whether binding of virions to human  
121 intestinal HT-29 cells was blocked by the presence of human monoclonal antibody AT12-015  
122 (Figure 4A). For antibody-mediated blocking, we pre-incubated equivalent amounts of virus with  
123 antibody at 1:10, 1:100, 1:1000, and 1:10000 dilutions for 1 hour at 37° C and then added the

124 complexes to cells. Cellular attachment proceeded under ice-cold conditions for 1 hour and  
125 afterwards unbound virions were removed with a series of gentle PBS wash steps. Cold binding  
126 ensures that HPeV3 remains at the surface of cells and is not internalized. When preformed  
127 antibody-decorated virions were added, either from mixing HPeV3 with stock or 1:10 dilution of  
128 antibody, no fluorescence signal was observed on the surface of HT29 cells similar to the mock  
129 infection (no virus) and antibody controls (Figure 4B - stock, 1:10, mock, antibody no virus).  
130 Small-sized clusters of virions were infrequently observed at excess levels of antibody (Figure 4B -  
131 stock, 1:10). In contrast, staining was clearly visible on the surface of cells incubated with HPeV3  
132 alone, as well as with higher dilutions of antibody, and fluorescence intensity was weaker at 1:100  
133 dilution albeit with a high standard deviation (Figure 4B - 1:10000, 1:1000, and 1:100). Virus mixed  
134 with 1:100 of antibody showed neutralizing activity without any apparent clumping (Figure 4B -  
135 1:100). Taken together, these results indicate that AT12-015 neutralizes HPeV3 infection  
136 extracellularly rather than by a post-attachment mechanism.

### 137 **RNA inside the HPeV3 capsid**

138 The HPeV3 virion contains ~7.4 kb of mostly unstructured single-stranded RNA genome. In the  
139 assembled particle, roughly 25% of the RNA adopts a defined conformation near the inner capsid  
140 surface, lining symmetry-related sites directly beneath the icosahedral five-fold vertices (19). For  
141 parechoviruses, detailed structural analysis of genome-capsid interactions has only been carried out  
142 for HPeV1 (21). Here we performed a similar analysis for HPeV3. The inside of our 2.8 Å HPeV3  
143 map shows stretches of RNA in the same region as defined for HPeV1. The RNA has a defined  
144 tertiary structure, forming a single-stranded loop with a significant portion involved in a rigid base-  
145 stacking motif that is capped by an aromatic side chain residue Trp 24 of VP3 with a small  
146 conjugated  $\pi$  system (Figure 5A and B). In this way, the tryptophan has stabilized its  $\pi$  orbitals to a  
147 resonance level with the aromatic orbitals of adjacent RNA bases to enable efficient packaging and  
148 formation of stable virions. EM density for the planar stacking profile is well-resolved, on the order  
149 of 25 Å in length, before reaching a helix-coil transition (Figure 5B). Coordinates for the six RNA

150 nucleotides from previous structural work on the HPeV1 virion are in good agreement with our  
151 modeled stacking motif. We fitted eight bases of RNA beneath the capsid, which included a portion  
152 of the packaging sequence described recently for HPeV1 (22). The final sequence docked was U<sup>0</sup>-  
153 G<sup>1</sup>-G<sup>2</sup>-U<sup>3</sup>-A<sup>4</sup>-U<sup>5</sup>-U<sup>6</sup> U<sup>n</sup>. Using the RNA motif we searched the HPeV3 A308/99 genome (Genbank  
154 code AB084913) and identified 33 sequences that contained G<sup>1</sup>-purine<sup>2</sup>-U<sup>3</sup>-purine<sup>4</sup>-U<sup>5</sup>, 13 of which  
155 include the full motif X<sup>0</sup>-G<sup>1</sup>-purine<sup>2</sup>-U<sup>3</sup>-purine<sup>4</sup>-U<sup>5</sup>-X<sup>6</sup>-X<sup>7</sup>-U<sup>8</sup>.

156 In addition to modeling the Trp 24-RNA contact in the cryo-EM structure, two other residues from  
157 the same VP3 strand, Lys 21 and Tyr 22, were found to interact with a neighboring RNA loop.  
158 These residues, along with Trp 24, in the context of the assembled pentamer, appear to be key for  
159 stabilizing the stacked RNA below the capsid vertex (Figure 5C). In fact, mutation of two of the  
160 amino acids, either Tyr 22 or Trp 24 to alanine, in HPeV1 is lethal confirming their essential role in  
161 virion assembly (22). Other capsid residues that further support the RNA loop under the vertex  
162 were identified in VP1, as well as VP3. Specifically, VP1 residues Arg 202, Cys203, and Asn 205,  
163 and VP3 residues Ala 18, Ser 19, Thr20, Leu 44, Thr 47, Arg 58, Phe 60, Tyr 61, and Arg 71, many  
164 of which are aromatic or positively charged, form important RNA base and backbone contacts, as  
165 well as complement the negative charge of the RNA (Figure 5D). In HPeV1, mutations of VP1  
166 residues Arg 202 and Cys 203 to Ala as well as VP3 residues Thr 44, Arg 55, and Arg 68 to Ala  
167 (VP3 residues Thr47, Arg 58, and Arg 71 in our structure) were shown to be lethal, indicating that  
168 these residues are important for RNA packaging and virion assembly (22).

169

## 170 **Discussion**

171 Exact knowledge of the structural, antigenic, and immunogenic features of HPeV3 is essential for  
172 understanding host-pathogen interaction, viral pathogenesis mechanisms, and for finding potential  
173 cures for infection and disease, which is pressing as HPeV3 outbreaks are widespread and may  
174 cause severe sepsis-like syndrome in neonates. Recently, we determined a structure of HPeV3 in  
175 complex with Fab fragments from a human monoclonal antibody AT12-015 by cryo-EM (19).

176 However, the strain of virus used in that study, HPeV3 isolate 152037, was not neutralized by  
177 addition of AT12-015. Furthermore the resolution of the reconstruction was only at 15 Å, which  
178 prevented atomic characterization of the epitope on the surface of the viral capsid. Here we report a  
179 2.8 Å-resolution cryo-EM structure of an AT12-015 Fab-decorated HPeV3 virion, isolate A308/99  
180 that is neutralized by the monoclonal antibody from infecting human intestinal HT29 cells. In the  
181 high-resolution structure, the antigen-antibody interface was well-defined and modeling of viral  
182 coat proteins and Fab molecules into density revealed an extended conformational epitope across  
183 the interface of adjacent asymmetric units, involving residues from different parts of neighboring  
184 VP0, VP1, and VP3 chains spatially juxtaposed by the structure of the capsid. When bound,  
185 monoclonal AT12-015 prevented virus attachment to target HT29 cells except for at high dilutions  
186 of antibody, indicating that neutralization occurs extracellularly and not by a post-attachment  
187 mechanism. In this way, we were able to identify the epitope of AT12-015 and determine how the  
188 antibody works against HPeV3 A308/99. In addition, the 2.8 Å map provided the most complete  
189 picture yet of ordered RNA on the inside of a human parechovirus.

190 Antibody AT12-015 was first isolated from the immune repertoire of a person with HPeV3 infection  
191 using the AIMSelect method and it broadly recognizes strains of HPeV3 but only neutralizes the  
192 prototype A308/99 virus that we used in the study (19, 27, 28). At high resolution we could clearly  
193 specify the conserved conformational epitope shared among HPeV3 strains, including solvent-  
194 accessible atoms in the interface region, which now includes contributions from VP0 (Glu 285, Asn  
195 289), VP1 (Asn 85, Asp 87, Thr 135-Asn 138, Lys 140, Thr 141, Arg 184), VP1' (Pro 215-Ser 218),  
196 and VP3' (Lys 99, Tyr 100, Val 119, Thr 121, Met 132, Thr 167, Asp 169, His 206-Gln 209, Leu  
197 252, Val 253; Figure 3A). No structural changes were induced upon complex formation. Atomic-  
198 level characterization brings clarity to exactly how Fab AT12-015 binds to the virion. Of particular  
199 interest is His 206 of VP3 as it was recently shown that an HPeV3 A308/99 variant mutated at this  
200 residue position to Tyr escapes neutralization by AT12-015. Our results provide important context to  
201 this observation by showing that the nitrogen atom of VP3 His 206 forms a salt bridge with the



202 carbonyl oxygen of Glu 105 in the Fab heavy chain at the center of the antibody footprint (27).  
203 Thus we can confirm a key role for VP3 His 206 in driving complex formation.  
204 Because antibodies often prevent virus attachment and entry into target cells, we tested whether  
205 AT12-015 blocks HPeV3 A308/99 binding to human intestinal HT29 cells. We found that mixing  
206 antibody with virions under saturating conditions efficiently inhibits viral adhesion to cells and this  
207 effect is only reversed at high dilutions of the antibody. In the presence of high amounts of AT12-  
208 015 small clumps of virus particles were infrequently observed, indicating that antibody-mediated  
209 aggregation plays a minor role in exacerbating adherence. Neutralization occurs thus presumably by  
210 either directly or indirectly preventing receptor engagement. Such specific targeting rather than  
211 generalized clumping is supported by the fact that of all HPeV3 strains bound by AT12-015, only  
212 isolate A308/99 is neutralized (27). To date, little is known about HPeV3 receptor and co-receptor  
213 dependencies as it lacks the RGD motif and hence probably utilizes an uptake mechanism that  
214 differs from other parechovirus types. This could account for type-specific neutralization, and in  
215 general usage of a different receptor by HPeV3 likely influences tropism and thus the unique  
216 disease severity in the human population.

217 It has become increasingly appreciated in recent years that for single-stranded RNA viruses, the life  
218 cycle is in part regulated by the secondary and tertiary structure of their genomes, hence the current  
219 high priority to understand protein-(single-stranded) RNA recognition motifs and RNA sequence-  
220 specific folding as it occurs in assembled virions (22, 29-33). Such information may help with  
221 efforts to inhibit viral propagation, as well as in nanotechnology applications aimed at harnessing  
222 either virus or virus-like systems for efficient gene delivery (34). Based on our cryo-EM data, we  
223 propose a mechanism for adding HPeV3 RNA to assembling shells that utilizes  $\pi$  electron  
224 delocalization from VP3 side chain Trp 24 to assist with nucleotide binding. Here, at the  
225 mechanistic level, RNA folding is stabilized by a capsid-locking step where Trp 24, accessible on  
226 the inner surface of capsid protein VP3, forms a geometrically favorable short-range stacking  
227 interaction with a purine, which is then further strengthened by long-range interactions as a result of

228 electronic resonance through further stacking of adjacent nucleotides. The 14 additional highly  
229 conserved capsid residues: VP1 Arg 202, Cys 203 and Asn 205, VP3 Ala 18, Ser 19, Thr 20, Lys 21,  
230 Tyr 22, Leu 44, Thr 47, Arg 58, Phe 60, Tyr 61, and Arg 71 help to position the ordered RNA loop  
231 against the inside of the capsid. From an evolutionary perspective, this means that over time the  
232 inner surface of the virus has been fine-tuned to orchestrate the interaction between VP3 Trp 24 and  
233 discrete sequences of genomic RNA, and that likewise the spacing of recognition motifs on the  
234 HPeV3 genome has been thermodynamically optimized so as to minimize the free energy of capsid  
235 assembly.

## 236 **Methods**

### 237 *Virus sample preparation*

238 Human colon adenocarcinoma (HT29) cells were propagated in McCoy's 5A medium supplemented  
239 with 1X non-essential amino acids, 1X antibiotic-antimycotic, and 10% fetal bovine serum with the  
240 culture condition of 37°C and 5% CO<sub>2</sub>. Cells were grown to ~90% confluency before inoculating  
241 with human parechovirus 3 (HPeV3) isolate A308/99 at a multiplicity of infection of 0.1. HPeV3  
242 A308/99 was grown in fresh medium as described above except that the medium was slightly  
243 modified to contain 1 mM MgCl<sub>2</sub>, 20 mM HEPES pH 7.4 and no FBS. Inoculated cells were  
244 incubated at 37°C for 3 days. Cells and medium were harvested. At this point concentration of  
245 HEPES was increased to 40 mM final concentration. The cells were opened by three freeze-thaw  
246 cycles and virus-containing medium was clarified by low-speed centrifugation. Afterwards the  
247 supernatant was carefully removed and concentrated via ultrafiltration using Centricon units with a  
248 cut-off at 100 kDa in weight. For purification, we applied a CsCl density gradient (top - 1.2502 g  
249 cm<sup>-3</sup>, bottom - 1.481 g cm<sup>-3</sup>) combined with ultracentrifugation (32,000 rpm, 4°C) for 18 hours in a  
250 Beckman type SW41 Ti rotor. The virus band was collected and the buffer exchanged into 1X TNM  
251 buffer: 10 mM Tris-HCl, pH 7.5, 150 mM NaCl, 1 mM MgCl<sub>2</sub>. Ultracentrifugation and buffer  
252 exchange were repeated. Concentration was estimated by Coomassie-blue-stained SDS-PAGE gel,

253 where different concentrations of bovine serum albumin solution were used as standards. Infectivity  
254 was measured using a TCID<sub>50</sub> endpoint dilution assay.

#### 255 *Generation of antigen-binding Fab fragment*

256 HPeV3 A308/99-specific monoclonal antibody (AT12-015) was obtained from AIMM Therapeutics  
257 (the Netherlands). AT12-015 antibody was digested to produce antigen-binding Fab fragments using  
258 the Pierce Fab micro preparation kit (Pierce). The Fab concentration was assessed by Coomassie-  
259 blue-stained SDS-PAGE gel, where different concentrations of bovine serum albumin solution were  
260 used as standards. For complex formation, 30  $\mu\text{L}$  of 0.1  $\mu\text{g}/\mu\text{L}$  virus and 9  $\mu\text{L}$  of 0.1  $\mu\text{g}/\mu\text{L}$  antibody  
261 were mixed (1:60 molar ratio) and incubated for 1 hour at 37°C.

#### 262 *Cryo-EM data acquisition*

263 Sample volumes of 3  $\mu\text{L}$  of purified HPeV3 A308/99-Fab complex were applied to glow-discharged  
264 ultrathin carbon-coated lacey 400-mesh copper grids (Ted Pella product #01824) and vitrified using  
265 a custom-made manual plunger. Cryo-grids were visualized with a FEI Titan Krios electron  
266 microscope operating at 300 kV accelerating voltage, at a nominal magnification of 75,000 $\times$  using a  
267 FEI Falcon II direct electron detector, corresponding to a pixel size of 1.06  $\text{\AA}$  on the specimen level.  
268 In total, 6,541 images with defocus values in the range of -0.5 to -2.5  $\mu\text{m}$  were recorded in movie  
269 mode with 1 second of total acquisition time. Each movie contained 18 frames with an accumulated  
270 dose of about 48 electrons per  $\text{\AA}^2$ .

#### 271 *Image processing and 3D reconstruction*

272 Dose-fractionated image stacks containing frames from 2 to 17 were subjected to beam-induced  
273 motion correction using MotionCor2 (35). Estimation of contrast transfer function parameters for  
274 each micrograph was done using Gctf (36). Particle selection, 2D classification, and 3D  
275 classification were performed on an unbinned dataset (1.06  $\text{\AA}/\text{pix}$ , 480 pixel box size) using  
276 RELION 2.0 (26). In total, 217,212 particle projections were selected. After reference-free 2D  
277 classification in RELION in the best classes containing 179,457 particle projections were used for  
278 further processing. A  $\sim 10$   $\text{\AA}$  reference map generated in AUTO3DEM from a modest-sized dataset

279 of 2050 particle images collected on a FEI Tecnai TF20 cryo-electron microscope filtered to 60 Å  
280 was used for initial maximum-likelihood-based 3D classification (37). Three classes accounting for  
281 74,927 particles were selected for 3D refinement and reconstruction. During post-processing step in  
282 RELION the map was masked with a soft mask and sharpened using a B-factor  $-70 \text{ \AA}^2$ . The final  
283 refinement resulted in a 2.8 Å map based on the gold-standard Fourier shell correlation 0.143  
284 criterion. Local resolution was determined using ResMap with the unsharpened map as an input  
285 (38).

### 286 *Atomic model building and refinement*

287 An initial atomic model for the HPeV3 A308/99-Fab complex was generated using I-TASSER and  
288 SWISS-MODEL based on the crystal structure of the HPeV1 virion (PDB ID: 4Z92) and Fab  
289 fragments of human monoclonal antibody AM28 (PDB ID: 4UDF) (21, 39-41). Docking of atomic  
290 coordinates was done manually using UCSF Chimera and the fit was further optimized using the  
291 ‘Fit in Map’ command (42). Inspection and further refinement was done using Coot 0.8.8 and this  
292 served as input for molecular dynamics flexible fitting (MDFF) (43). The MDFF program was used  
293 together with NAMD and VMD to further enhance the fit of models into cryo-EM density (44-46).  
294 A scale factor of 1 was employed to weigh the contribution of the cryo-EM map to the overall  
295 potential function used in MDFF. Simulations included 20,000 steps of minimization and 100,000  
296 steps of molecular dynamics under implicit solvent conditions with secondary structure restraints in  
297 place. To achieve the best fit of the model to the cryo-EM density three iterations between Coot and  
298 MDFF were performed with the last step being relaxation of the structure by an energy  
299 minimization step using MDFF. For hydrogen bond detection at the virus-antibody interface we  
300 examined structure in UCSF Chimera using a strict distance cutoff of 3.6 Å and for geometrical  
301 constrains we only included hydrogen bonds within the range of 138 - 180° (47, 48). RNA-protein  
302 interface was analyzed in UCSF Chimera using the same (3.6 Å) distance cutoff.

### 303 *Binding assay*

304 HT29 cells were seeded on 96-well plates at a density of 40000 cells per well in the same culture  
305 conditions as during virus sample preparation. Antibody AT12-015 was incubated as stock (0.5  
306 mg/ml) or as a dilution (1:10, 1:100, 1:1000, 1:10000) with 1x CsCl-gradient purified HPeV3.  
307 Specifically, 2  $\mu$ L of antibody was mixed with 2  $\mu$ L of virus ( $8 * 10^5$  pfu/ml) for 1 hour at 37 °C.  
308 The incubation took place in McCoy's 5A medium supplemented with 1X GlutaMAX, 1X non-  
309 essential amino acids, 1X antibiotic-antimycotic, 20 mM HEPES, and 30 mM MgCl<sub>2</sub>. Plates  
310 containing cells and tubes containing antibody-virus complexes were placed on ice and allowed to  
311 cool. Growth medium of the cells was exchanged to cold-binding medium. Antibody-virus  
312 complexes, as well as either viruses or antibodies alone were then added to cells and incubated for 1  
313 hour at ice-cold temperature. After incubation, cells were washed 3 times with 0.5 % BSA-PBS. For  
314 wells containing antibody-decorated virus, the primary staining step was skipped. Otherwise, AT12-  
315 015 was used as a primary antibody (diluted in 0.5% BSA-PBS) for unlabeled virus or in wells  
316 designated to serve as an antibody control. After three additional washing steps, secondary antibody  
317 was added for 1 hour. A further series of washes was carried out and Hoechst (1  $\mu$ g/ml) was added  
318 for visualization of cell nuclei. Wells were then washed a last time and plates were sealed.

### 319 *High content imaging and analyses*

320 All experiments were performed in 96-well plates (Perkin Elmer) and images were acquired using  
321 the automated fluorescence microscope CellInsight from Thermo Scientific. Image analysis was  
322 completed using CellProfiler (<http://cellprofiler.org>).

### 323 *Accession numbers*

324 The final density map has been deposited to Electron Microscopy Databank (EMDB) with  
325 accession code EMD-0069 (<https://www.ebi.ac.uk/ebisearch/search.ebi?db=allebi&query=emd-0069&requestFrom=searchBox>). The atomic model has been deposited to Protein Databank (PDB)  
326 with accession code 6GV4 (<http://www.ebi.ac.uk/pdbe/entry/pdb/6gv4>).

328

### 329 **Acknowledgements**

330 We thank Sergey Guryanov and Shabih Shakeel for helpful discussions. We thank Benita Löflund,  
331 Pasi Laurinmäki, Lauri Pulkkinen (University of Helsinki), and Jiri Novacek (Masaryk University),  
332 as well as Instruct-FI, the Biocenter Finland National cryo-electron microscopy and light  
333 microscopy units, Institute of Biotechnology, and the CSC-IT Center for Science Ltd. for providing  
334 technical assistance and facilities to carry out the work. We thank Hiroyuki Shimizu (National  
335 Institute of Infectious Diseases) and Katja C. Wolthers (Amsterdam Medical Center) for kindly  
336 providing HPeV3 A308/99. We thank Tim Beaumont (AIMM Therapeutics) for kindly providing  
337 the AT12-015 antibody. This work was supported by iNEXT (project number 653706), a Horizon  
338 2020 program of the European Union (iNEXT PID:2141); CIISB research infrastructure project  
339 LM2015043 funded by MEYS CR (CF Cryo-electron Microscopy and Tomography CEITEC  
340 Masaryk University, Czech Republic); the Academy of Finland (275199 to S.J.B.), the Sigrid  
341 Juselius Foundation (S.J.B.), the People Programme (Marie Curie Actions) of the European  
342 Union's Seventh Framework Programme (FP7/2007-2013) under REA grant agreement (PIEF-  
343 GA-2013-628150 to A.D.) and the Seventh Framework Programme of the European Union AIPP  
344 under contract PIAPP-GA-2013-612308 to S.J.B.

#### 345 **Author Contributions**

346 Conceptualization (A.D., S.J.B.); formal analysis (A.D.); data curation (A.D., S.J.B.);  
347 investigation (A.D., J.W.F., J.J.J.J.); methodology (A.D., J.W.F., J.J.J.J., J.A.G., S.J.B.); software  
348 (J.A.G.); validation (A.D., J.W.F.); visualization (A.D.); manuscript writing (J.W.F.); manuscript  
349 revision (A.D., J.A.G., S.J.B.); funding acquisition (A.D., S.J.B.); supervision (A.D., S.J.B.);  
350 project administration (S.J.B.).

#### 351 **Declaration of Interests**

352 The authors declare no competing interests.

#### 353 **References**

- 354 1. **Ito M, Yamashita T, Tsuzuki H, Takeda N, Sakae K.** 2004. Isolation and identification of  
355 a novel human parechovirus. *J Gen Virol* **85**:391-398.

- 356 2. **Olijve L, Jennings L, Walls T.** 2018. Human Parechovirus: an Increasingly Recognized  
357 Cause of Sepsis-Like Illness in Young Infants. *Clin Microbiol Rev* **31**.
- 358 3. **Khatami A, McMullan BJ, Webber M, Stewart P, Francis S, Timmers KJ, Rodas E,**  
359 **Druce J, Mehta B, Sloggett NA, Cumming G, Papadakis G, Kesson AM.** 2015. Sepsis-  
360 like disease in infants due to human parechovirus type 3 during an outbreak in Australia.  
361 *Clin Infect Dis* **60**:228-236.
- 362 4. **Boivin G, Abed Y, Boucher FD.** 2005. Human parechovirus 3 and neonatal infections.  
363 *Emerg Infect Dis* **11**:103-105.
- 364 5. **Levorson RE, Jantusch BA, Wiedermann BL, Spiegel HM, Campos JM.** 2009. Human  
365 parechovirus-3 infection: emerging pathogen in neonatal sepsis. *Pediatr Infect Dis J* **28**:545-  
366 547.
- 367 6. **Selvarangan R, Nzabi M, Selvaraju SB, Ketter P, Carpenter C, Harrison CJ.** 2011.  
368 Human parechovirus 3 causing sepsis-like illness in children from midwestern United  
369 States. *Pediatr Infect Dis J* **30**:238-242.
- 370 7. **Wolthers KC, Benschop KS, Schinkel J, Molenkamp R, Bergevoet RM, Spijkerman IJ,**  
371 **Kraakman HC, Pajkrt D.** 2008. Human parechoviruses as an important viral cause of  
372 sepsislike illness and meningitis in young children. *Clin Infect Dis* **47**:358-363.
- 373 8. **Sano K, Hamada H, Hirose S, Sugiura K, Harada S, Koizumi M, Hara M, Nishijima**  
374 **H, Taira M, Ogura A, Ogawa T, Takanashi JI.** 2018. Prevalence and characteristics of  
375 human parechovirus and enterovirus infection in febrile infants. *Pediatr Int* **60**:142-147.
- 376 9. **Harvala H, Calvert J, Van Nguyen D, Clasper L, Gadsby N, Molyneaux P, Templeton**  
377 **K, McWilliams Leitch C, Simmonds P.** 2014. Comparison of diagnostic clinical samples  
378 and environmental sampling for enterovirus and parechovirus surveillance in Scotland, 2010  
379 to 2012. *Euro Surveill* **19**.

- 380 10. **Britton PN, Dale RC, Nissen MD, Crawford N, Elliott E, Macartney K, Khandaker G,**  
381 **Booy R, Jones CA, Investigators P-A.** 2016. Parechovirus Encephalitis and  
382 Neurodevelopmental Outcomes. *Pediatrics* **137**:e20152848.
- 383 11. **Schuffenecker I, Javouhey E, Gillet Y, Kugener B, Billaud G, Floret D, Lina B, Morfin**  
384 **F.** 2012. Human parechovirus infections, Lyon, France, 2008-10: evidence for severe cases.  
385 *J Clin Virol* **54**:337-341.
- 386 12. **Sedmak G, Nix WA, Jentzen J, Haupt TE, Davis JP, Bhattacharyya S, Pallansch MA,**  
387 **Oberste MS.** 2010. Infant deaths associated with human parechovirus infection in  
388 Wisconsin. *Clin Infect Dis* **50**:357-361.
- 389 13. **van Zwol AL, Lequin M, Aarts-Tesselaar C, van der Eijk AA, Driessen GA, de Hoog**  
390 **M, Govaert P.** 2009. Fatal neonatal parechovirus encephalitis. *BMJ Case Rep* **2009**.
- 391 14. **Verboon-Maciolek MA, Groenendaal F, Hahn CD, Hellmann J, van Loon AM, Boivin**  
392 **G, de Vries LS.** 2008. Human parechovirus causes encephalitis with white matter injury in  
393 neonates. *Ann Neurol* **64**:266-273.
- 394 15. **Vergnano S, Kadambari S, Whalley K, Menson EN, Martinez-Alier N, Cooper M,**  
395 **Sanchez E, Heath PT, Lyall H.** 2015. Characteristics and outcomes of human parechovirus  
396 infection in infants (2008-2012). *Eur J Pediatr* **174**:919-924.
- 397 16. **Aizawa Y, Izumita R, Saitoh A.** 2017. Human parechovirus type 3 infection: An emerging  
398 infection in neonates and young infants. *J Infect Chemother* **23**:419-426.
- 399 17. **Esposito S, Rahamat-Langendoen J, Ascolese B, Senatore L, Castellazzi L, Niesters**  
400 **HG.** 2014. Pediatric parechovirus infections. *J Clin Virol* **60**:84-89.
- 401 18. **Wildenbeest JG, Harvala H, Pajkrt D, Wolthers KC.** 2010. The need for treatment  
402 against human parechoviruses: how, why and when? *Expert Rev Anti Infect Ther* **8**:1417-  
403 1429.
- 404 19. **Shakeel S, Westerhuis BM, Domanska A, Koning RI, Matadeen R, Koster AJ, Bakker**  
405 **AQ, Beaumont T, Wolthers KC, Butcher SJ.** 2016. Multiple capsid-stabilizing



- 406 interactions revealed in a high-resolution structure of an emerging picornavirus causing  
407 neonatal sepsis. *Nat Commun* **7**:11387.
- 408 20. **Stanway G, Hyypiä T.** 1999. Parechoviruses. *J Virol* **73**:5249-5254.
- 409 21. **Kalynych S, Palkova L, Plevka P.** 2016. The Structure of Human Parechovirus 1 Reveals  
410 an Association of the RNA Genome with the Capsid. *J Virol* **90**:1377-1386.
- 411 22. **Shakeel S, Dykeman EC, White SJ, Ora A, Cockburn JJB, Butcher SJ, Stockley PG,  
412 Twarock R.** 2017. Genomic RNA folding mediates assembly of human parechovirus. *Nat*  
413 *Commun* **8**:5.
- 414 23. **Boonyakiat Y, Hughes PJ, Ghazi F, Stanway G.** 2001. Arginine-glycine-aspartic acid  
415 motif is critical for human parechovirus 1 entry. *J Virol* **75**:10000-10004.
- 416 24. **Seitonen J, Susi P, Heikkilä O, Sinkovits RS, Laurinmäki P, Hyypiä T, Butcher SJ.**  
417 2010. Interaction of alphaVbeta3 and alphaVbeta6 integrins with human parechovirus 1. *J*  
418 *Virol* **84**:8509-8519.
- 419 25. **Al-Sunaidi M, Williams CH, Hughes PJ, Schnurr DP, Stanway G.** 2007. Analysis of a  
420 new human parechovirus allows the definition of parechovirus types and the identification  
421 of RNA structural domains. *J Virol* **81**:1013-1021.
- 422 26. **Scheres SH.** 2012. RELION: implementation of a Bayesian approach to cryo-EM structure  
423 determination. *J Struct Biol* **180**:519-530.
- 424 27. **Karelehto E, van der Sanden S, Geraets JA, Domanska A, van der Linden L,  
425 Hoogendoorn D, Koen G, van Eijk H, Shakeel S, Beaumont T, de Jong M, Pajkrt D,  
426 Butcher SJ, Wolthers KC.** 2017. Strain-dependent neutralization reveals antigenic  
427 variation of human parechovirus 3. *Sci Rep* **7**:12075.
- 428 28. **Kwakkenbos MJ, Diehl SA, Yasuda E, Bakker AQ, van Geelen CM, Lukens MV, van  
429 Bleek GM, Widjojoatmodjo MN, Bogers WM, Mei H, Radbruch A, Scheeren FA, Spits  
430 H, Beaumont T.** 2010. Generation of stable monoclonal antibody-producing B cell receptor-  
431 positive human memory B cells by genetic programming. *Nat Med* **16**:123-128.

- 432 29. **Borodavka A, Dykeman EC, Schrimpf W, Lamb DC.** 2017. Protein-mediated RNA  
433 folding governs sequence-specific interactions between rotavirus genome segments. *Elife* **6**.
- 434 30. **Borodavka A, Tuma R, Stockley PG.** 2012. Evidence that viral RNAs have evolved for  
435 efficient, two-stage packaging. *Proc Natl Acad Sci U S A* **109**:15769-15774.
- 436 31. **Koning RI, Gomez-Blanco J, Akopjana I, Vargas J, Kazaks A, Tars K, Carazo JM,  
437 Koster AJ.** 2016. Asymmetric cryo-EM reconstruction of phage MS2 reveals genome  
438 structure in situ. *Nat Commun* **7**:12524.
- 439 32. **Patel N, Wroblewski E, Leonov G, Phillips SEV, Tuma R, Twarock R, Stockley PG.**  
440 2017. Rewriting nature's assembly manual for a ssRNA virus. *Proc Natl Acad Sci U S A*  
441 **114**:12255-12260.
- 442 33. **Sokoloski KJ, Nease LM, May NA, Gebhart NN, Jones CE, Morrison TE, Hardy RW.**  
443 2017. Identification of Interactions between Sindbis Virus Capsid Protein and Cytoplasmic  
444 vRNA as Novel Virulence Determinants. *PLoS Pathog* **13**:e1006473.
- 445 34. **Butterfield GL, Lajoie MJ, Gustafson HH, Sellers DL, Nattermann U, Ellis D, Bale JB,  
446 Ke S, Lenz GH, Yehdego A, Ravichandran R, Pun SH, King NP, Baker D.** 2017.  
447 Evolution of a designed protein assembly encapsulating its own RNA genome. *Nature*  
448 **552**:415-420.
- 449 35. **Zheng SQ, Palovcak E, Armache JP, Verba KA, Cheng Y, Agard DA.** 2017.  
450 MotionCor2: anisotropic correction of beam-induced motion for improved cryo-electron  
451 microscopy. *Nat Methods* **14**:331-332.
- 452 36. **Zhang K.** 2016. Gctf: Real-time CTF determination and correction. *J Struct Biol* **193**:1-12.
- 453 37. **Yan X, Sinkovits RS, Baker TS.** 2007. AUTO3DEM--an automated and high throughput  
454 program for image reconstruction of icosahedral particles. *J Struct Biol* **157**:73-82.
- 455 38. **Kucukelbir A, Sigworth FJ, Tagare HD.** 2014. Quantifying the local resolution of cryo-  
456 EM density maps. *Nat Methods* **11**:63-65.

- 457 39. **Roy A, Kucukural A, Zhang Y.** 2010. I-TASSER: a unified platform for automated protein  
458 structure and function prediction. *Nat Protoc* **5**:725-738.
- 459 40. **Schwede T, Kopp J, Guex N, Peitsch MC.** 2003. SWISS-MODEL: An automated protein  
460 homology-modeling server. *Nucleic Acids Res* **31**:3381-3385.
- 461 41. **Shakeel S, Westerhuis BM, Ora A, Koen G, Bakker AQ, Claassen Y, Wagner K,**  
462 **Beaumont T, Wolthers KC, Butcher SJ.** 2015. Structural basis of human parechovirus  
463 neutralization by human monoclonal antibodies. *J Virol* doi:10.1128/JVI.01429-15.
- 464 42. **Pettersen EF, Goddard TD, Huang CC, Couch GS, Greenblatt DM, Meng EC, Ferrin**  
465 **TE.** 2004. UCSF Chimera--a visualization system for exploratory research and analysis. *J*  
466 *Comput Chem* **25**:1605-1612.
- 467 43. **Emsley P, Lohkamp B, Scott WG, Cowtan K.** 2010. Features and development of Coot.  
468 *Acta Crystallogr D Biol Crystallogr* **66**:486-501.
- 469 44. **Humphrey W, Dalke A, Schulten K.** 1996. VMD: visual molecular dynamics. *J Mol Graph*  
470 **14**:33-38, 27-38.
- 471 45. **Phillips JC, Braun R, Wang W, Gumbart J, Tajkhorshid E, Villa E, Chipot C, Skeel**  
472 **RD, Kale L, Schulten K.** 2005. Scalable molecular dynamics with NAMD. *J Comput*  
473 *Chem* **26**:1781-1802.
- 474 46. **Trabuco LG, Villa E, Mitra K, Frank J, Schulten K.** 2008. Flexible fitting of atomic  
475 structures into electron microscopy maps using molecular dynamics. *Structure* **16**:673-683.
- 476 47. **Baker EN, Hubbard RE.** 1984. Hydrogen bonding in globular proteins. *Prog Biophys Mol*  
477 *Biol* **44**:97-179.
- 478 48. **Ippolito JA, Alexander RS, Christianson DW.** 1990. Hydrogen bond stereochemistry in  
479 protein structure and function. *J Mol Biol* **215**:457-471.

480

481 **Table 1: Summary of cryo-EM data collection, refinement, and validation statistics**

482

483 **Figure legends**

484 **Figure 1: Resolution assessment for the HPeV3-Fab complex**

485 (A) “Gold standard” FSC curve showing an overall nominal resolution at 2.8 Å.

486 (B) Central cross-section of three-dimensional density map alongside structure colored according to  
487 local resolution. Two-, three- and five-fold symmetry axes are labeled.

488 **Figure 2: Visualization of Fab-decorated HPeV3**

489 (A-C) Virus-Fab reconstruction shown radially color-coded (purple 100 Å, yellow 120 Å, light blue  
490 140 Å, blue 145 Å, and orange 150 Å).

491 (A) Surface view down a two-fold axis of symmetry. Propeller regions can be seen as a dark blue  
492 triangles on the capsid surface, the Fabs are orange.

493 (B) Cutaway view showing RNA (purple) at five-fold vertices inside the viral capsid.

494 (C) Central cross-section with well-defined layers of density corresponding to RNA, capsid, and  
495 Fab.

496 (D) Side chains for viral coat proteins VP0 (blue), VP1 (green), and VP3 (light blue), as well as Fab  
497 heavy and light chains  $V_H$  (orange) and  $V_L$  (light brown) respectively.

498 (E) Modeled asymmetric unit with a Fab molecule bound.

499 (F) High resolution at the Fab AT12-015-HPeV3 interface.

500 (G) RNA anchoring on the inner surface of the virus is mediated by a tryptophan (Trp 24) residue  
501 from VP3.

502 **Figure 3: Interactions between Fab AT12-015 and HPeV3**

503 (A) Fab binds to an epitope extended across neighboring asymmetric units in the assembled virion.

504 Viral capsid residues that participate in Fab heavy ( $V_H$ ) and light chain ( $V_L$ ) binding are highlighted  
505 in yellow and are reported in the accompanying table.

506 (B) Stabilizing interactions at the interface. Residues that form hydrogen bonds or a salt bridge are  
507 highlighted in yellow on the left, and colored by chain on the enlarged inset on the right. In the in-

508 set, hydrogen bonds are shown as black dashed lines along with a centrally located salt-bridge high-  
509 lighted in red.

510 **Figure 4: Antibody AT12-015 blocks virus binding to HT29 cells**

511 (A) Effect of preincubation of HPeV3 with different amounts of human monoclonal antibody  
512 AT12-015. Virus was mixed with antibody for 60 minutes at 37°C and then added to HT29 cells for  
513 60 minutes cold binding. Cell nuclei were visualized using a Hoechst stain and virus binding was  
514 scored by measuring Alexa Fluor 488 intensity. The results are the average of three repeats of the  
515 cold binding assay. The error bars represent the standard error of the mean (SEM).

516 (B) Representative fluorescence images of HPeV3 incubated in the presence or absence of varying  
517 amounts of antibody.

518 **Figure 5: Ordered RNA inside the HPeV3 virion**

519 (A) RNA density segmented from within the virion seen along an icosahedral five-fold axis. The  
520 boxed segment of the density is enlarged in B.

521 (B) Eight nucleotides fit to their corresponding density before reaching the helix-coil transition.

522 (C) VP3 tails bridge two adjacent loops of RNA to promote efficient packaging and assembly.

523 Small portion of the capsid VP3 sequence (AAs Leu 16-Arg 26) is shown to clarify the VP3-RNA  
524 network on the inner surface of the viral capsid.

525 (D) The binding pocket for RNA on the inside of the capsid involves residues from VP1 and VP3.

526 One RNA loop is stabilized by residues from a single VP1 chain (green) and three VP3 chains (light  
527 blue designated by ',', and ''').

528

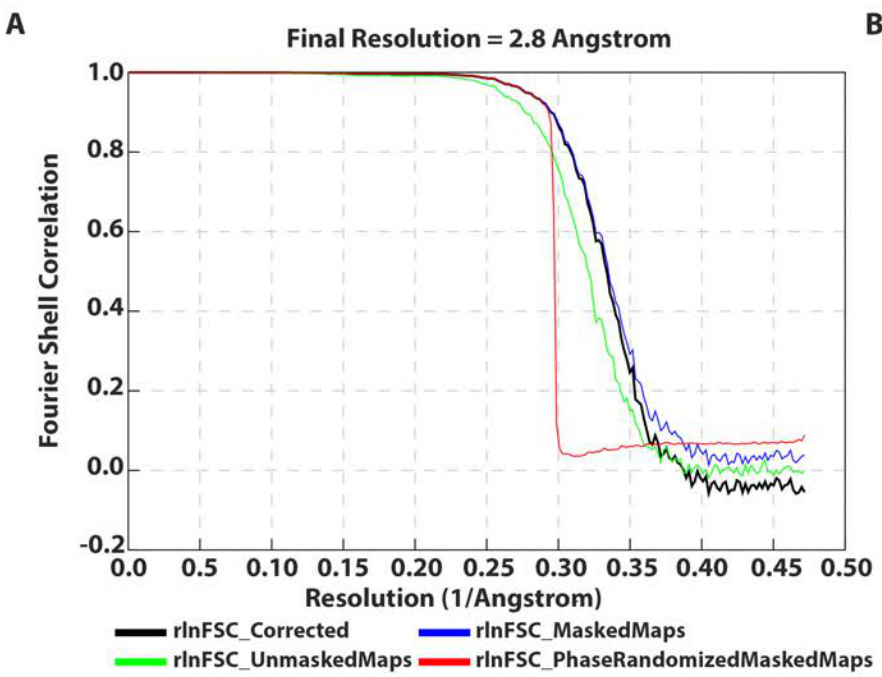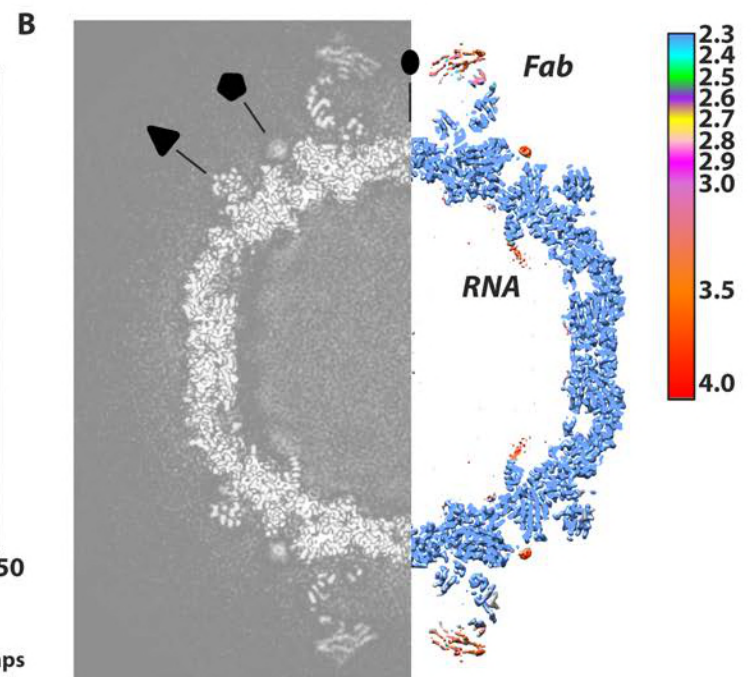

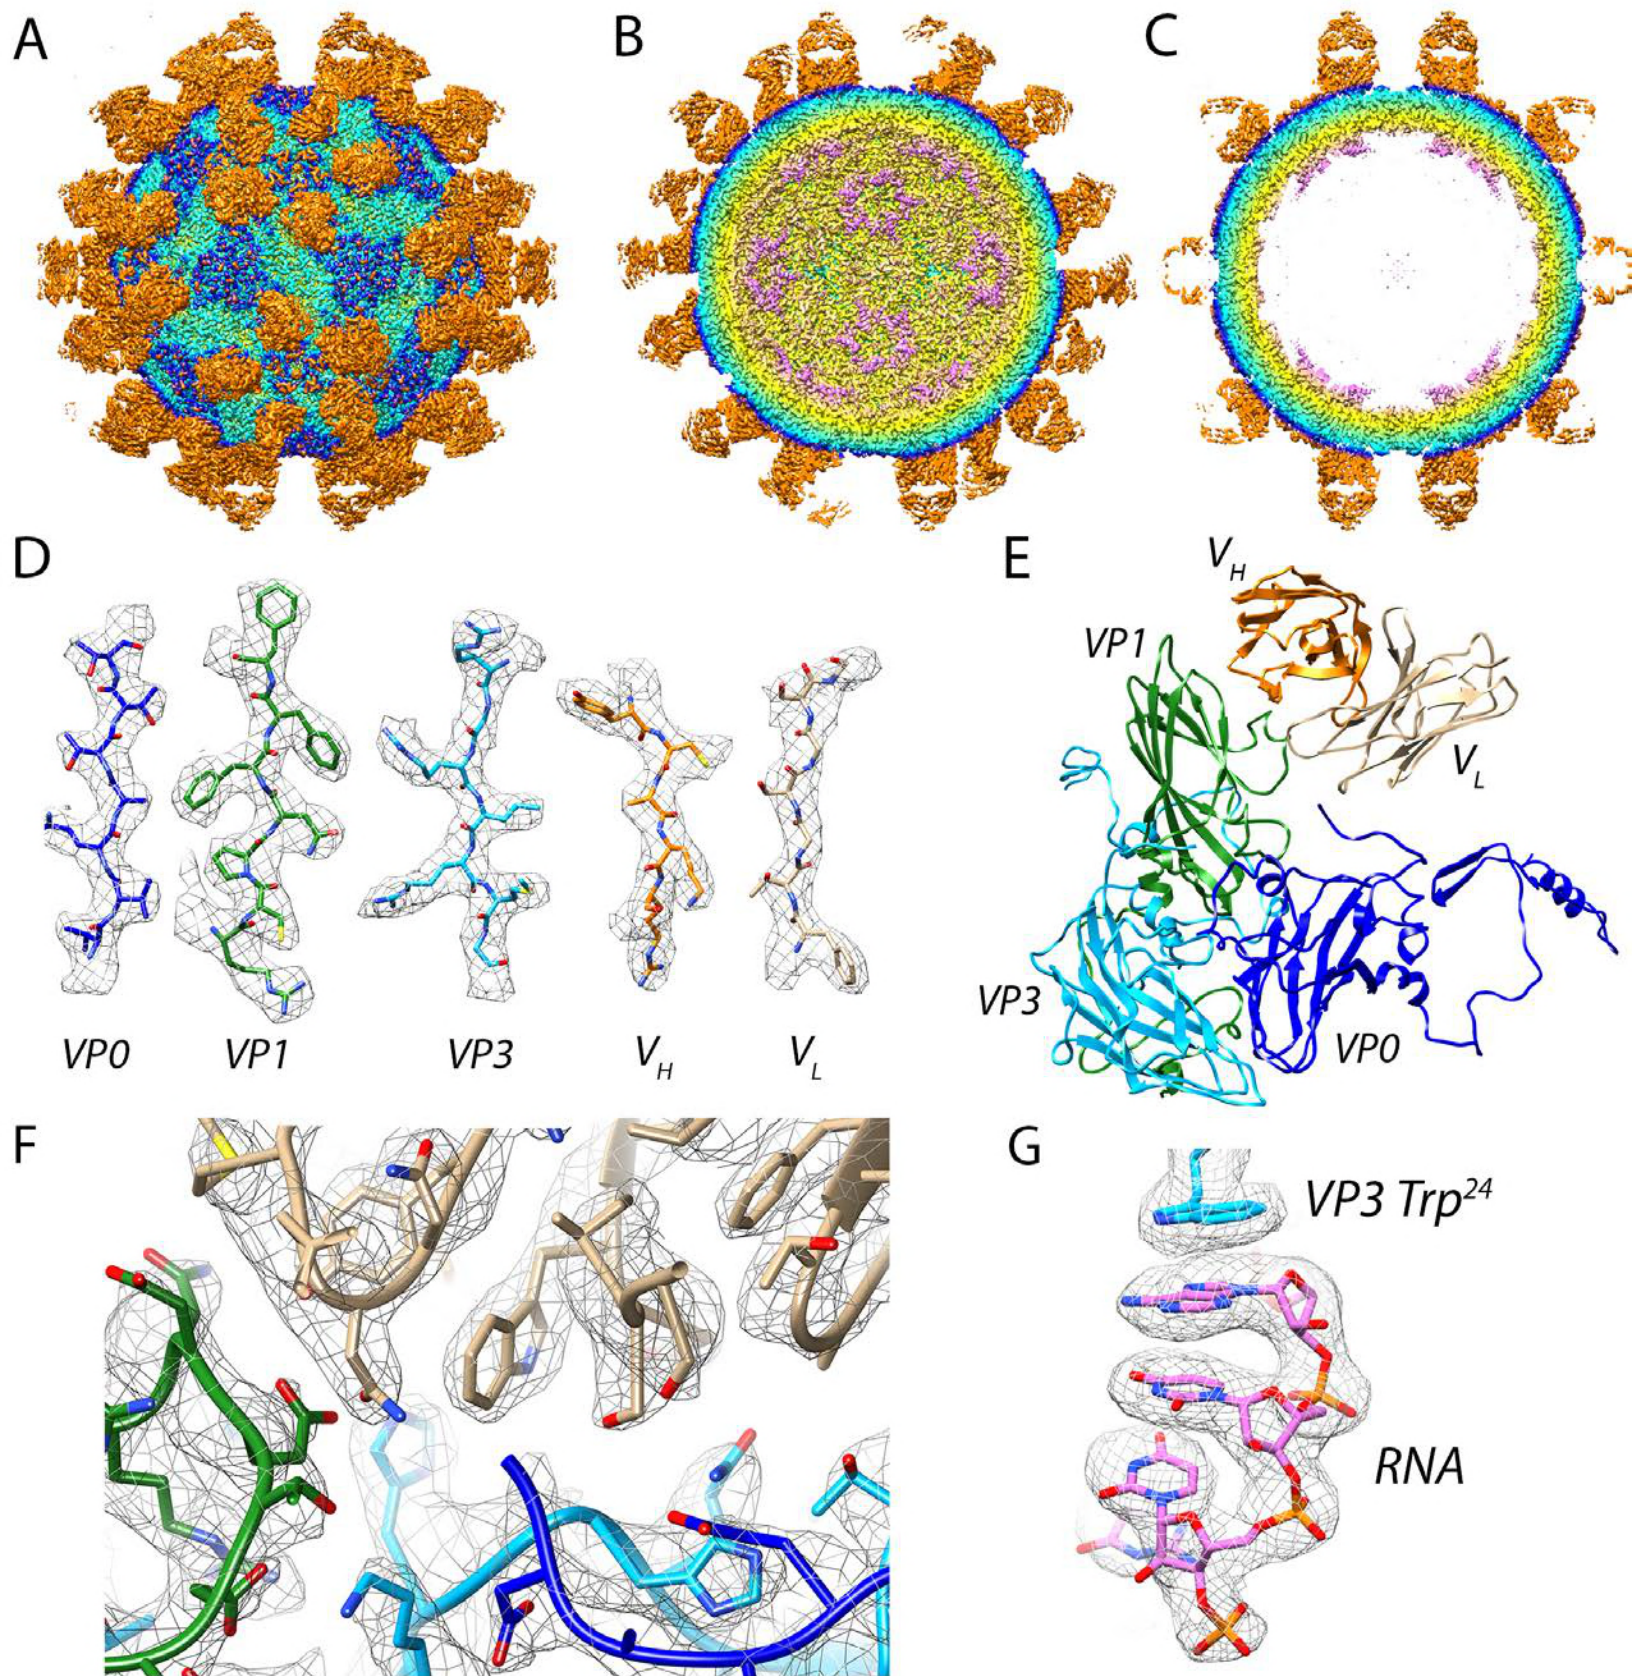

A

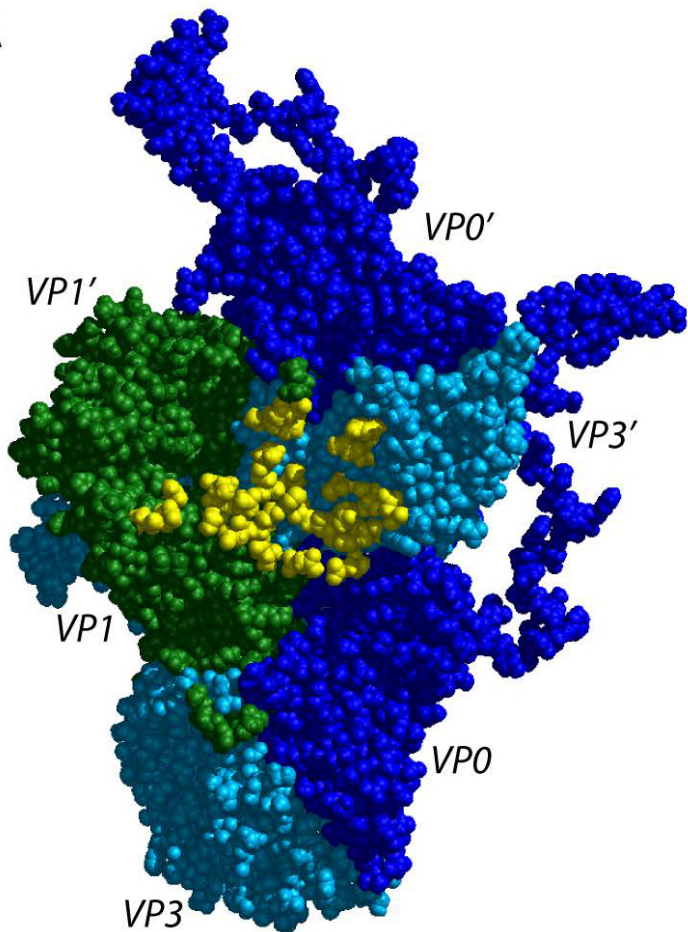

|      | $V_L$                                                     | $V_H$                                  |
|------|-----------------------------------------------------------|----------------------------------------|
| VP0  | E285, N289                                                |                                        |
| VP1  | T135, E136, D137, N138                                    | N85, D87, D137, N138, K140, T141, R184 |
| VP1' |                                                           | P215, T216, G217, S218                 |
| VP3' | K99, Y100, V119, T121, T167, D169, H206, G207, H208, Q209 | M132, H206, L252, V253                 |

B

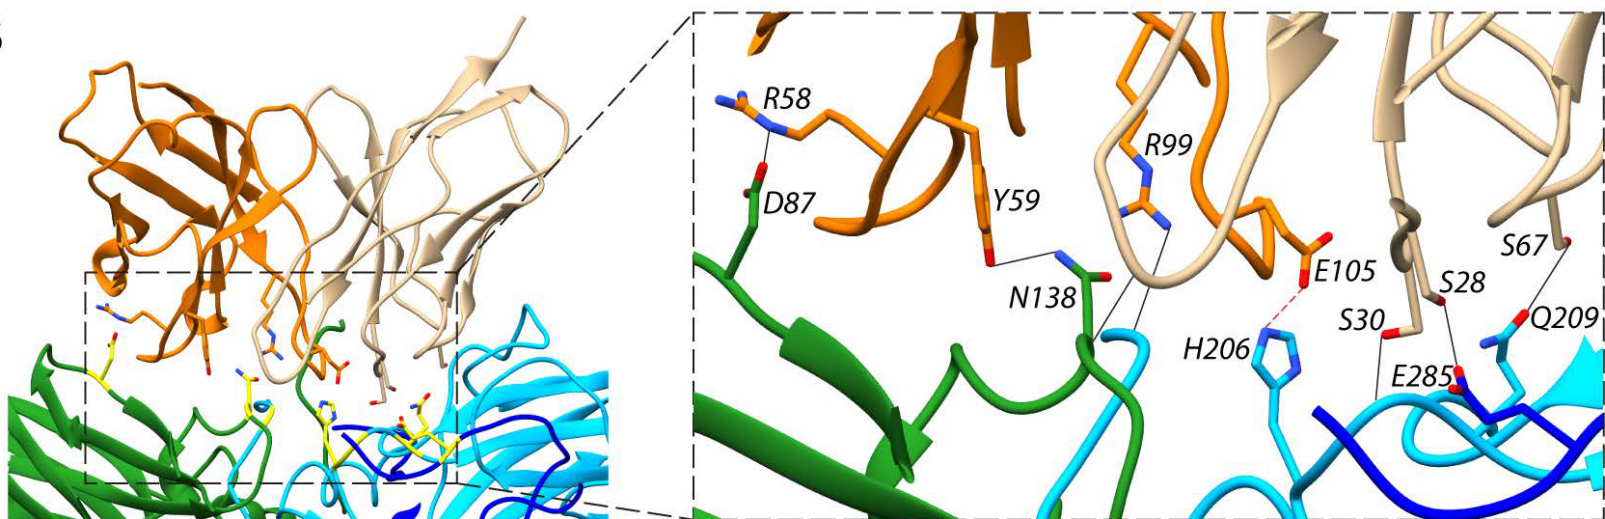



A

## Effect of antibody AT12-015 on virus binding to cells

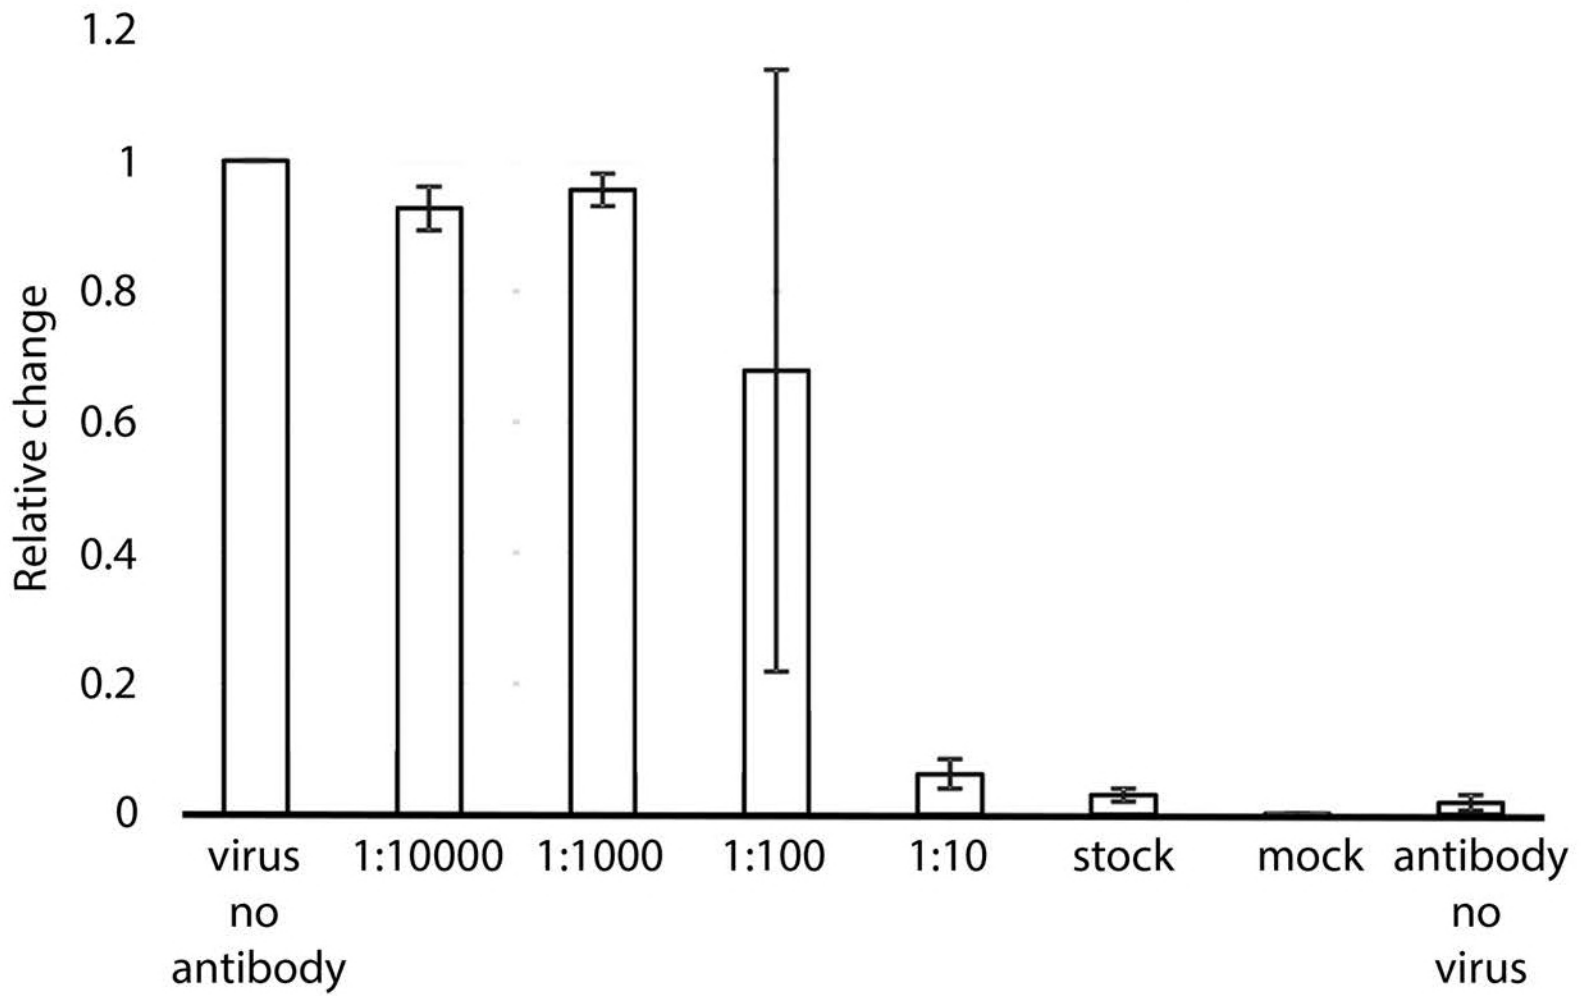

B

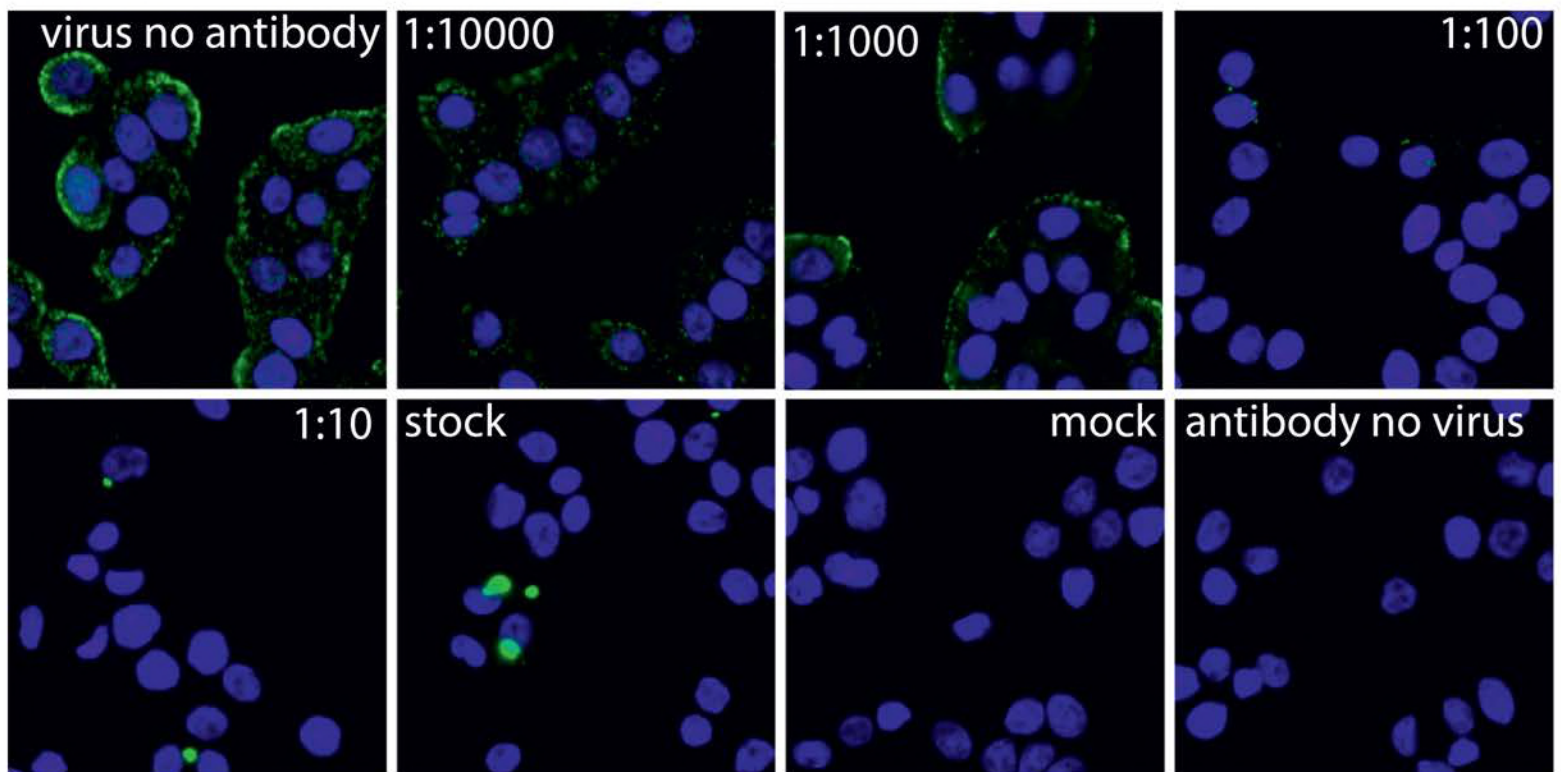

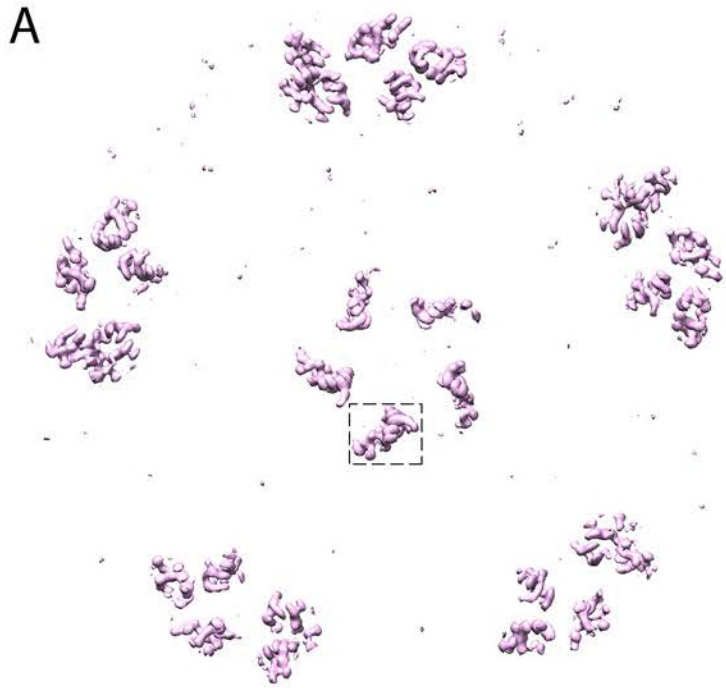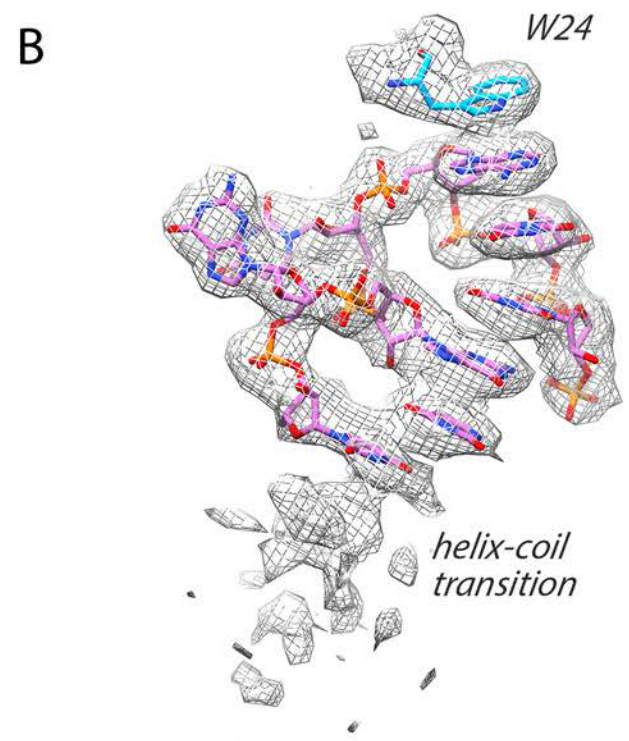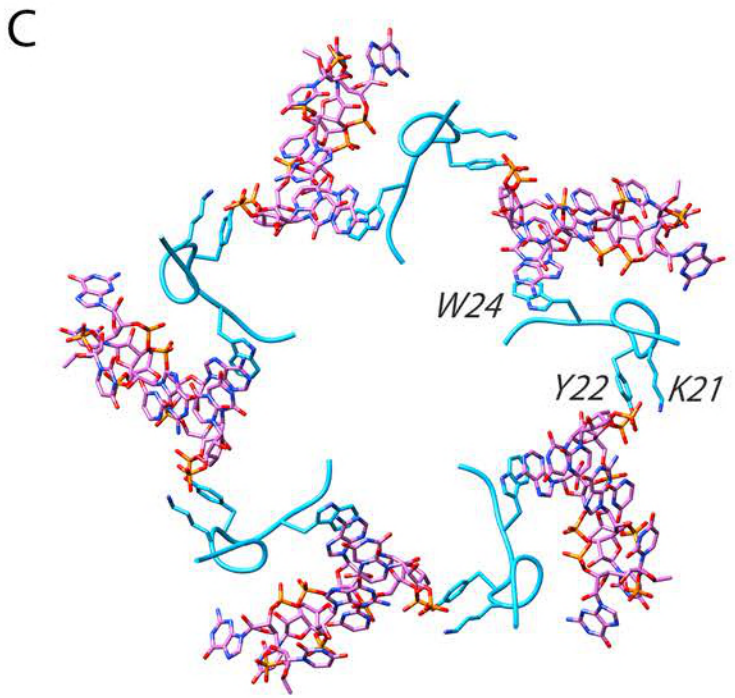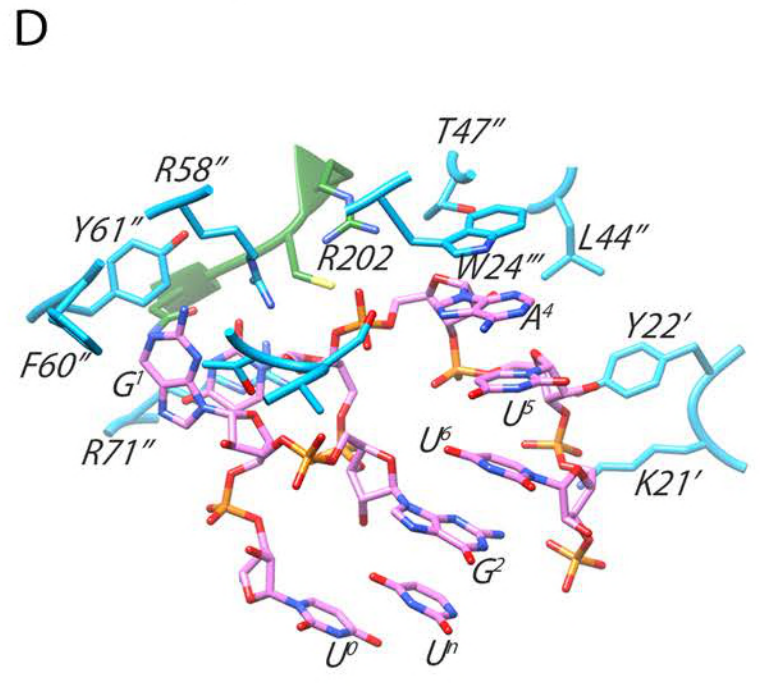

---

HPeV3-Fab complex

---

***Data collection***

|                                           |       |
|-------------------------------------------|-------|
| Voltage (kV)                              | 300   |
| Electron exposure (e-/Å <sup>2</sup> X s) | 48    |
| Pixel size (Å)                            | 1.06  |
| Number of micrographs                     | 6,541 |

***Reconstruction***

|                            |        |
|----------------------------|--------|
| Number of particles        | 74,927 |
| B factor (Å <sup>2</sup> ) | -70    |
| FSC threshold              | 0.143  |
| Resolution (Å)             | 2.8    |

***Model building***

|                                   |          |
|-----------------------------------|----------|
| VP0 (amino acid coverage)         | 34 - 289 |
| VP1 (amino acid coverage)         | 25 - 219 |
| VP3 (amino acid coverage)         | 16 - 256 |
| RNA (nt)                          | 8        |
| Fab heavy chain (V <sub>H</sub> ) | 2 - 119  |
| Fab light chain (V <sub>L</sub> ) | 2 - 109  |

***Model validation***

|                           |                                               |
|---------------------------|-----------------------------------------------|
| MolProbity score          | 1.55/96 <sup>th</sup> percentile<br>(protein) |
| Ramachandran outliers (%) | 0.93 (protein)                                |
| Poor rotamers (%)         | 3.91 (protein)                                |
| Clashscore                | 0 (protein), 4.35 (RNA)                       |

---
